# Supplementary material for: Auranofin induces urothelial carcinoma cell death via reactive oxygen species production and synergy with cisplatin
Source: PubMed Central journal article supplement — Oncol Lett. 2021 Dec 27;23(2):61. doi: 10.3892/ol.2021.13179 (PMC8756563; doi:10.3892/ol.2021.13179), 2021-12-27

Figure S1. Effects of Cis on the growth of urothelial carcinoma cells. HT 1376 and BFTC 909 cells were treated with the indicated concentrations of cisplatin for 48 h. Cell viability was determined using a Cell Counting Kit-8 assay. Data are representative of at least three independent experiments and shown as mean  $\pm$  SD. Cis, Cisplatin.

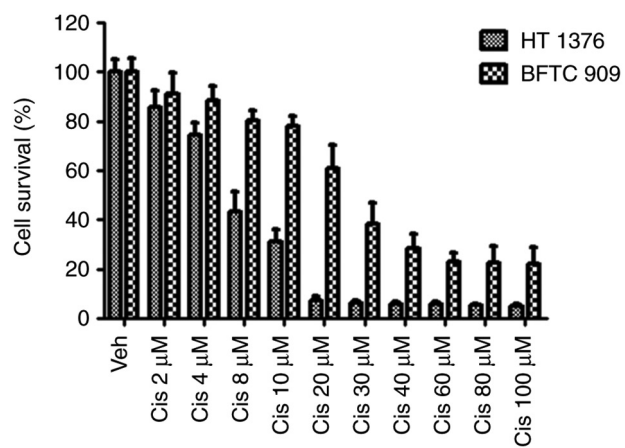

Supplement: Supplementary_Data.pdf [file Supplementary_Data.pdf]
